# Supplementary material
Source: Royal Society of Chemistry journal article supplement (doi:10.1039/d5tc04552e)
Supplement: d5tc04552e1.pdf [file d5tc04552e1.pdf]

Supplementary Information

**Multilayer Interfacial Engineering of Al–Ce Metallic Glass for Brittleness  
Mitigation and Reliable Motion Sensing**

Jae Sang Cho<sup>a,†</sup>, Emad S. Goda<sup>b,†</sup>, Woongsik Jang<sup>b,c</sup>, Keum Hwan Park<sup>d</sup>, Dong Hwan Wang<sup>a,b,\*</sup>

<sup>a</sup>Department of Intelligent Semiconductor Engineering, Chung-Ang University, 84 Heukseok-ro, Dongjak-gu, Seoul 06974, Republic of Korea

<sup>b</sup>School of Integrative Engineering, Chung-Ang University, 84 Heukseok-ro, Dongjak-gu, Seoul 06974, Republic of Korea

<sup>c</sup>Center for Polymers and Organic Solids and Department of Chemistry and Biochemistry, University of California at Santa Barbara Santa Barbara, CA 93106, USA

<sup>d</sup>Display Research Center Korea Electronics Technology Institute 25 Saenari-ro, Bundang-gu, Seongnam-si, Gyeonggi-do, 13509, Republic of Korea

†These authors contributed equally to this work.

---

\* Corresponding author, E-mail king0401@cau.ac.kr (Prof. D.H. Wang)

Keywords: Metallic glass, nanoindentation, shear banding, strain sensor, motion sensing

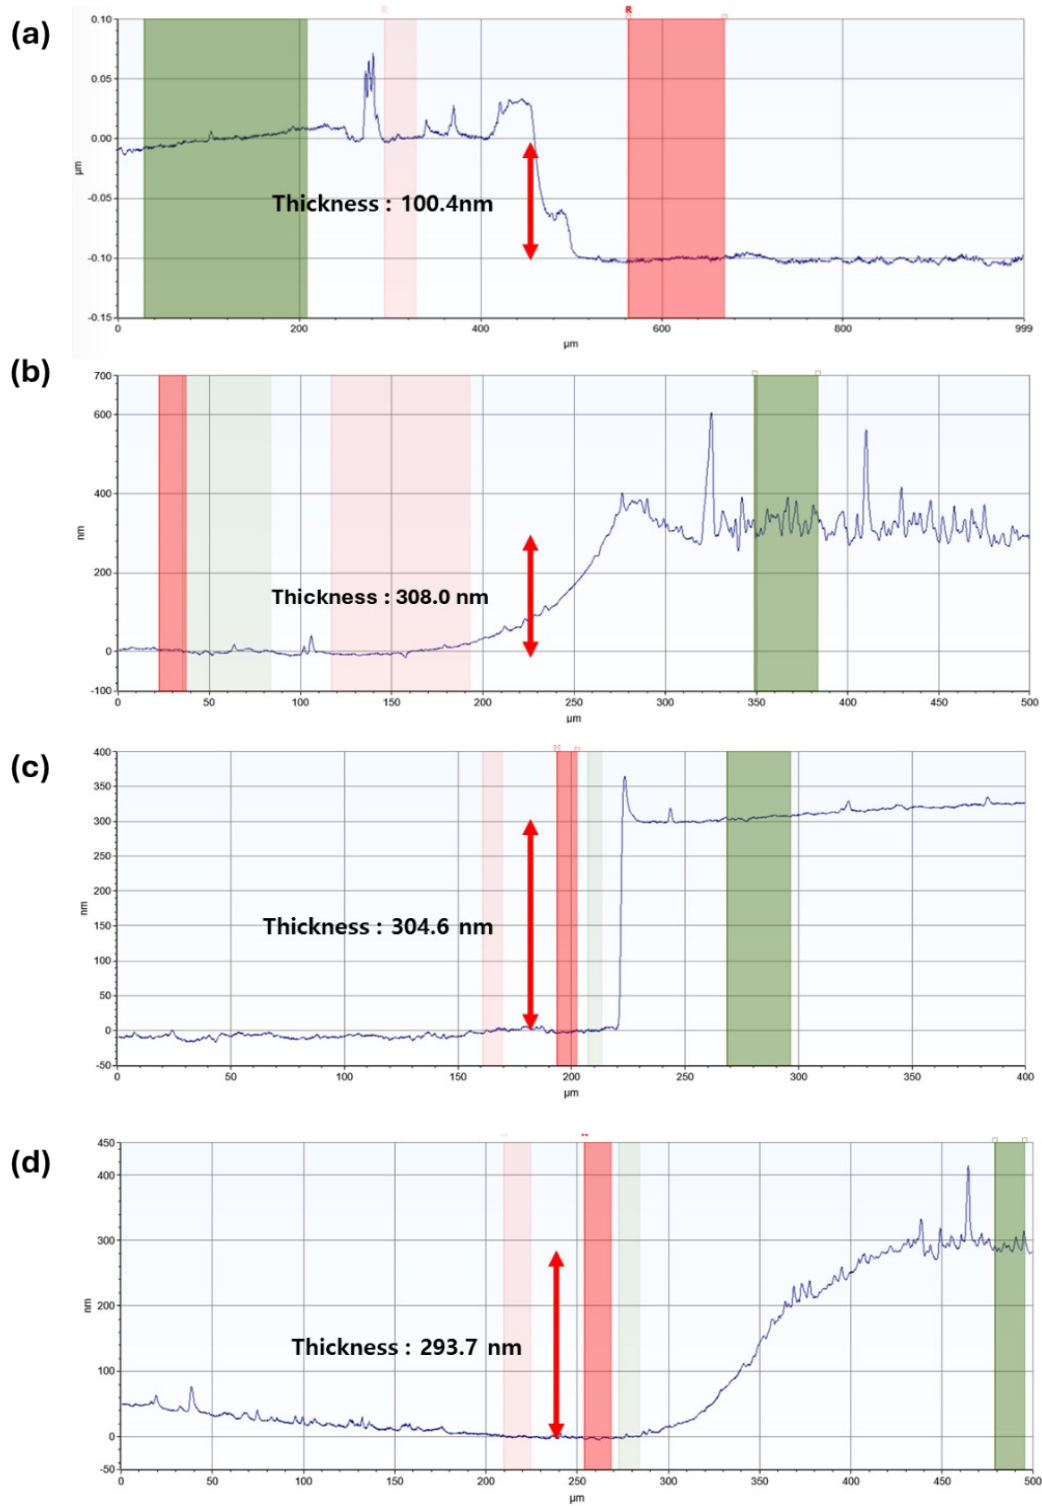

**Fig. S1.** Thickness measurements of (a) 100 nm amorphous AlCe, (b) 300 nm crystalline Al, (c) 300 nm amorphous AlCe, and (d) 300 nm multilayered metallic glass using an alpha-step surface profiler.

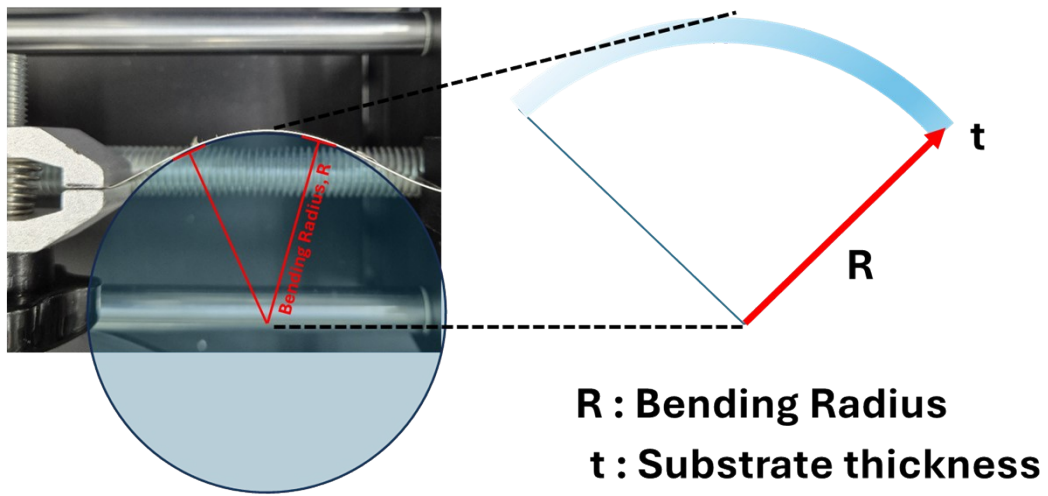

**Fig. S2.** Photograph of the bending test setup and a schematic illustration of the parameters used for bending strain calculation.

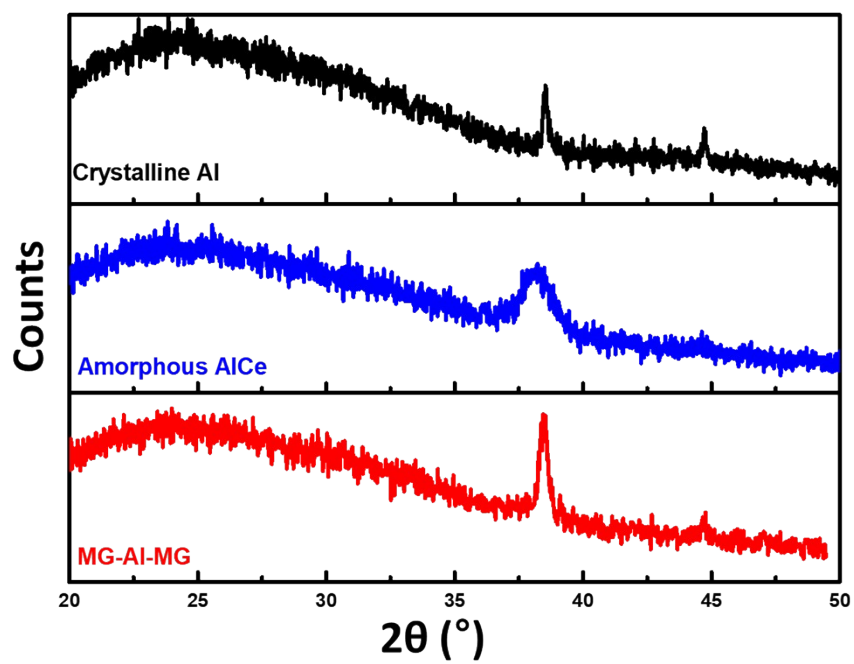

**Fig. S3.** X-ray diffraction profiles of crystalline Al, amorphous AlCe, and the multilayered metallic glass.

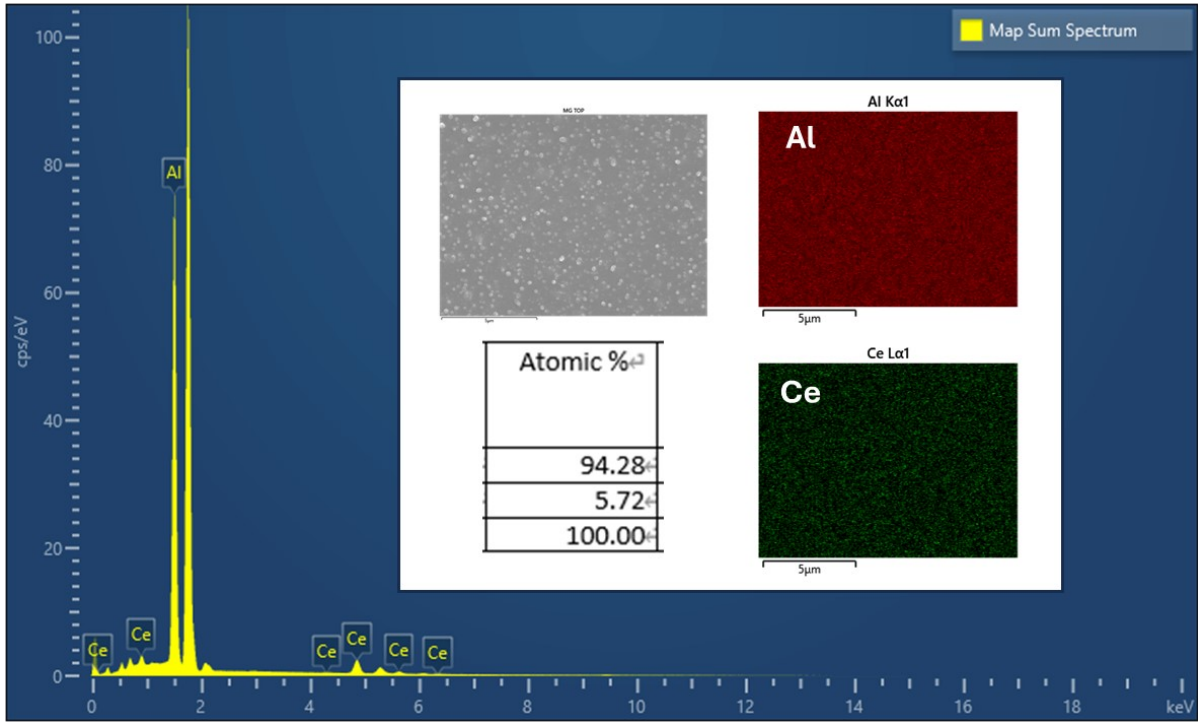

**Fig. S4.** Compositional analysis of the sputtered amorphous AlCe layer, showing the atomic ratio of Al and Ce.

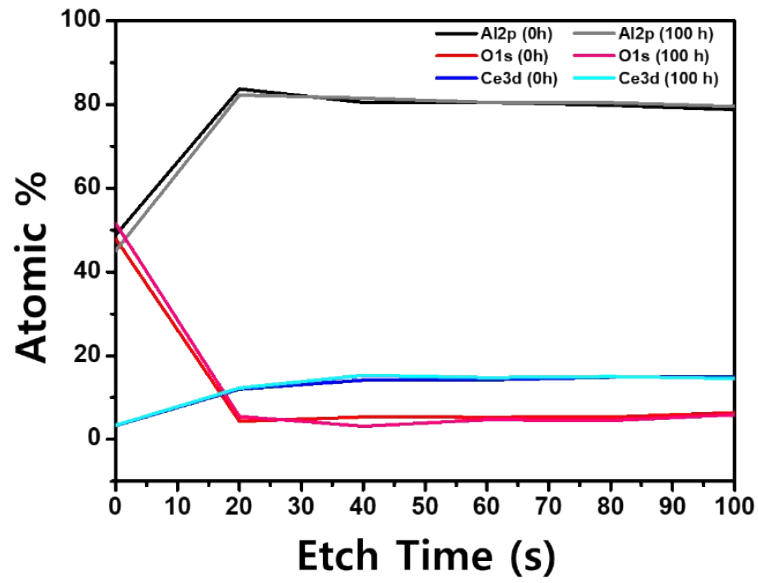

**Fig. S5.** XPS depth profile of AlCe metallic glass electrode, demonstrating the absence of internal oxygen contamination and the pristine metallic state of the interfaces.

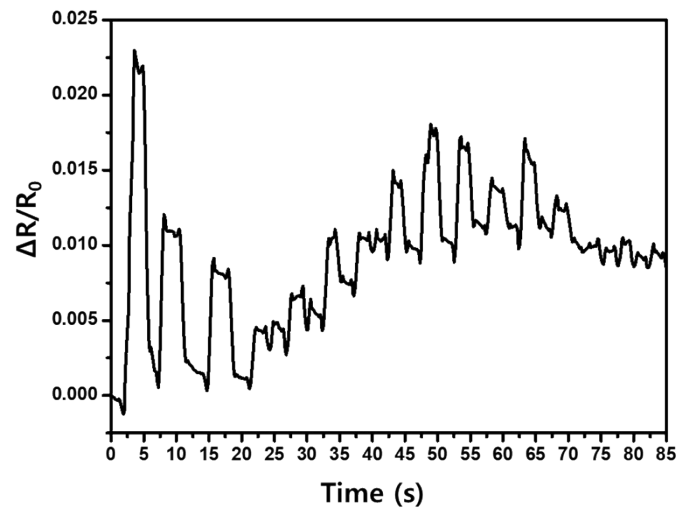

**Fig. S6.** Results of the cyclic bending test under a bending strain of 0.8% obtained from crystalline Al thin film.

**(a) Crystalline Al**

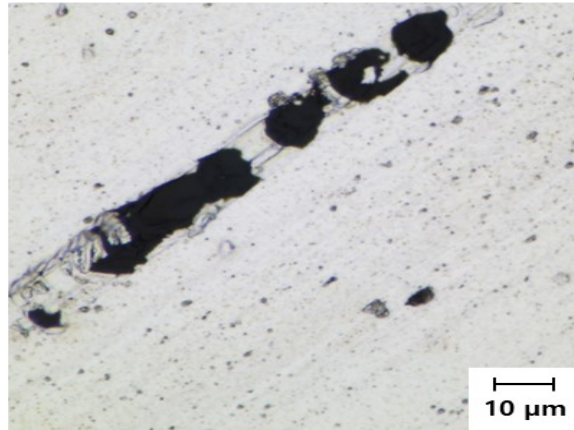

**(b) AlCe**

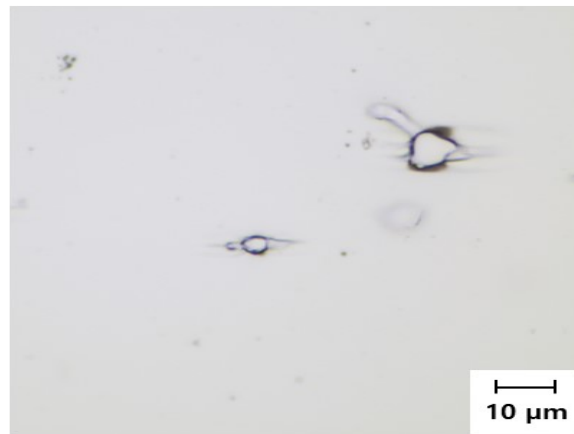

**(c) Al-AlCe**

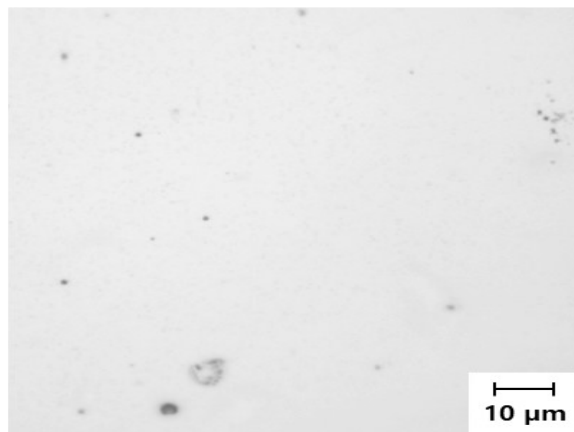

**Fig. S7.** Optical microscopy (OM) images of the electrode surfaces after the severe bending test. (a) Single-layer crystalline Al exhibiting catastrophic crack propagation and severe delamination. (b) Single-layer amorphous AlCe showing localized shear bands evolving into micro-cracks. (c) The pristine, entirely crack-free surface of the AlCe metallic glass layer deposited on Al layer (Al-AlCe).

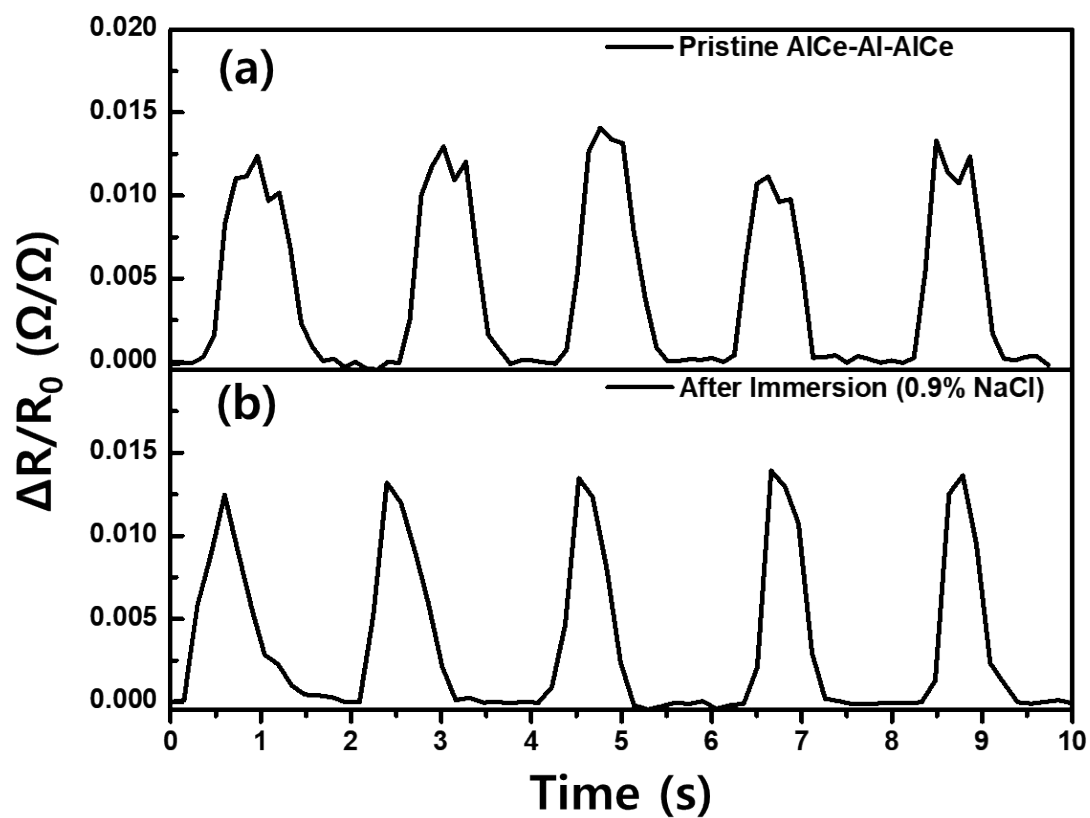

**Fig. S8.** Evaluation of the piezoresistive stability in a simulated sweaty environment. Strain-sensing responses of the multilayer electrode (a) before and (b) after complete immersion in a 0.9% NaCl saline solution for 100 minutes.

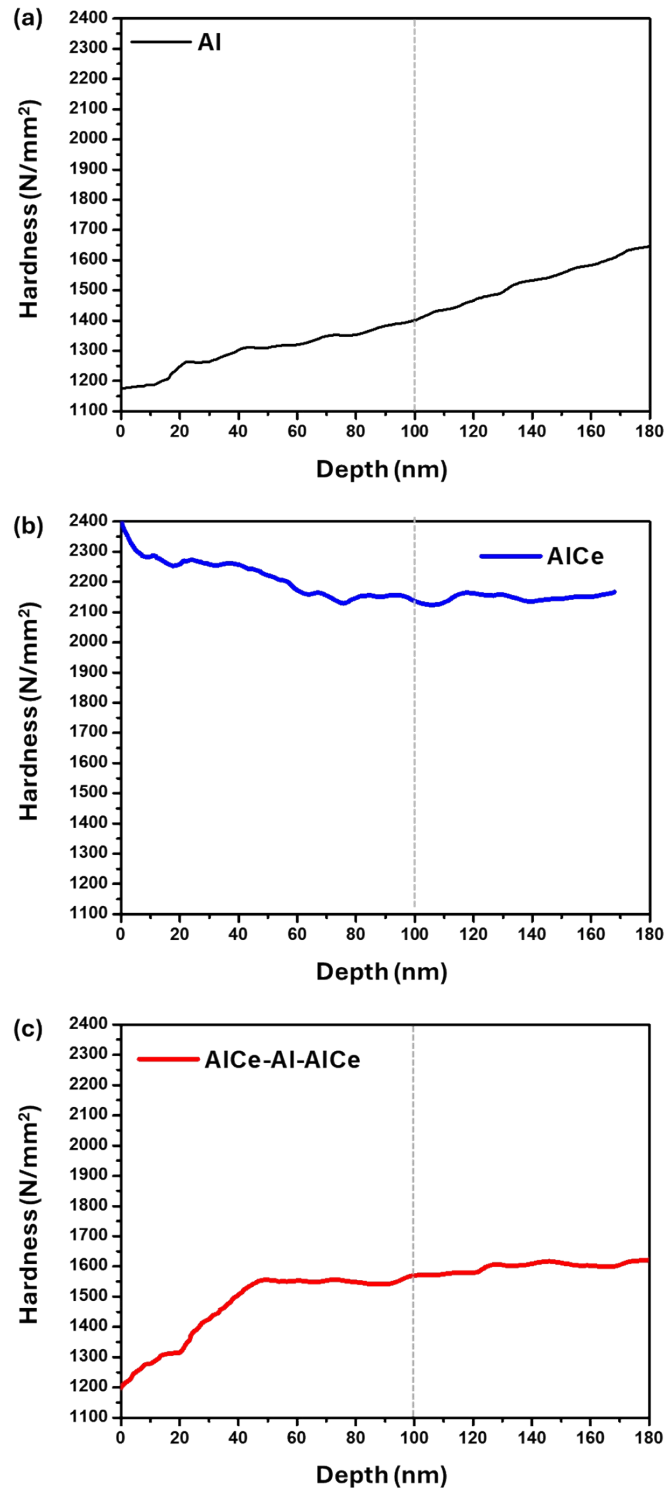

**Fig. S9.** Vickers hardness measurements according to the indentation depth, (a) crystalline Al, (b) amorphous AlCe, (c) multilayered AlCe-Al-AlCe

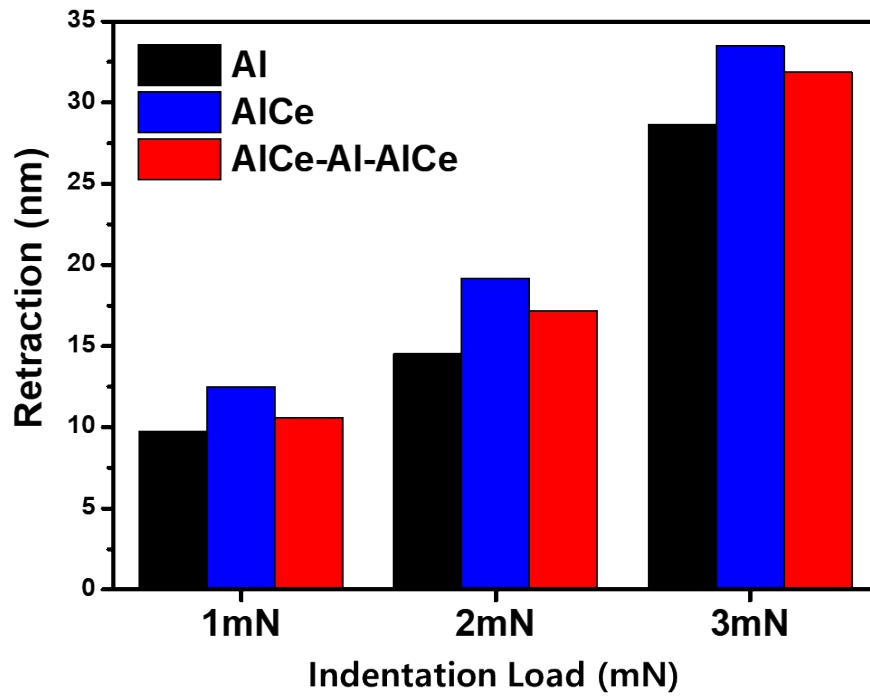

**Fig. S10.** Retraction distances from nanoindentation analyses of Al, AlCe, and multilayered metallic glass under varying indentation loads.

**Table S1.** Full width at half maximum (FWHM) of the X-ray diffraction peak at  $2\theta = 38.51^\circ$  for the investigated electrodes.

| <b>Electrode</b> | <b>FWHM</b> |
|------------------|-------------|
| Crystalline Al   | 0.228       |
| Amorphous AlCe   | 1.109       |
| Multilayer MG    | 0.370       |

**Table S2.** Comparison of strain sensing performances of MG-based electrodes in previously reported studies.

| <b>Composition</b>                                                    | <b>Electrode Type</b> | <b>Thickness/Diameter (nm)</b> | <b>Gauge Factor</b> | <b>Maximum Strain (%)</b> | <b>Linearity (R<sup>2</sup>)</b> | <b>Ref</b> |
|-----------------------------------------------------------------------|-----------------------|--------------------------------|---------------------|---------------------------|----------------------------------|------------|
| Pd <sub>40</sub> Cu <sub>30</sub> Ni <sub>10</sub> P <sub>20</sub>    | Fiber                 | 70000                          | 2.28                | 2.20                      | 0.99                             | [S1]       |
| Pd <sub>40</sub> Cu <sub>30</sub> Ni <sub>10</sub> P <sub>20</sub>    | Fiber                 | 6500                           | 2.22                | 2.16                      | 0.99                             | [S2]       |
| Zr <sub>55</sub> Cu <sub>30</sub> Ni <sub>5</sub> Al <sub>10</sub>    | Thin Film             | 300                            | 2.86                | 1.00                      | 0.99                             | [S3]       |
| Zr <sub>58</sub> Al <sub>14</sub> Ni <sub>11</sub> Co <sub>16</sub>   | Thin Film             | 100                            | 1.1                 | 0.70                      | 0.98                             | [S4]       |
| Zr <sub>55</sub> Cu <sub>30</sub> Al <sub>10</sub> Ni <sub>5</sub>    | Thin Film             | 110                            | 1.1~4.3             | 0.19                      | N.A.                             | [S5]       |
| Al <sub>94</sub> Ce <sub>6</sub> /Al/Al <sub>94</sub> Ce <sub>6</sub> | Thin Film             | 300                            | 3.11                | 1.10                      | 0.99                             | This Work  |

## References

- [S1] J. Yi, H.Y. Bai, D.Q. Zhao, M.X. Pan, W.H. Wang, Piezoresistance effect of metallic glassy fibers, *Appl Phys Lett* 98 (2011).
- [S2] J. Yi, L. Huo, D. Zhao, M. Pan, H. Bai, W. Wang, Toward an ideal electrical resistance strain gauge using a bare and single straight strand metallic glassy fiber, *Sci China Phys Mech Astron* 55 (2012) 609–613.
- [S3] H.J. Xian, C.R. Cao, J.A. Shi, X.S. Zhu, Y.C. Hu, Y.F. Huang, S. Meng, L. Gu, Y.H. Liu, H.Y. Bai, Flexible strain sensors with high performance based on metallic glass thin film, *Appl Phys Lett* 111 (2017).
- [S4] J.S. Cho, W. Jang, K.H. Park, D.H. Wang, Metallic amorphous alloy for long-term stable electrodes in organic sensors and photovoltaics, *Org Electron* 84 (2020) 105811.
- [S5] Y.-C. Chuang, T.-Y. Cheng, Y.-C. Tsai, Flexible printed circuit board strain sensor embedded in a miniaturized pneumatic finger, *IEEE Sens J* 22 (2022) 22456–22463.
